# Supplementary material for: Molecular interactions of Bcl-2 and Bcl-xL with mortalin: identification and functional characterization
Source: Oxford University Press journal article supplement (doi:10.1042/bsr20130034), 2013-09-23
Supplement: bsr033e073add.pdf [file bsr033e073add.pdf]

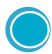

## OPEN ACCESS

## SUPPLEMENTARY DATA

# Molecular interactions of Bcl-2 and Bcl-xL with mortalin: identification and functional characterization

Nishant SAXENA\*<sup>1</sup>, Shashank P. KATIYAR†<sup>1</sup>, Ye LIU\*, Abhinav GROVER†, Ran GAO\*, Durai SUNDAR†<sup>2</sup>, Sunil C. KAUL\*<sup>2</sup> and Renu WADHWA\*<sup>2</sup>

\*National Institute of Advanced Industrial Science and Technology (AIST), Central 4, 1-1-1 Higashi, Tsukuba Science City 305-8562, Japan, and †Department of Biochemical Engineering and Biotechnology, Indian Institute of Technology (IIT) Delhi, Hauz Khas, New Delhi 110016, India

**Table S1 Predicted amino acid residues of proteins that participate in docking**

| Mortalin | Bcl-2                            | Bcl-xL                           |
|----------|----------------------------------|----------------------------------|
| 320–400  | 12–29, 87–103, 113–119, 215–last | 8–21, 135–149, 145–170, 216–last |

**Table S2 List of functional residues at the interface of mortalin, Bcl-2 and Bcl-xL proteins**

| Protein  | Residues                                                                                 |
|----------|------------------------------------------------------------------------------------------|
| Mortalin | Val-373, Gly-376, Asp-377, Asp-380, Val-381, Leu-382, Leu-383, Leu-384, Val-386, Thr-387 |
| Bcl-2    | Ser-116, Cys-229, Val-92, Leu-95, Gln-118, Val-226, Ala-113                              |
| Bcl-xL   | Tyr-15, Ser-18, Gln-19, Gly-21, Trp-213, Phe-214, Thr-216, Leu-226, Leu-229, Phe-230     |

**Table S3 Interfacial residues in docked protein–protein complexes before MD simulations**

| Mortalin–Bcl-2 Complex                                                                                     |                                                                                                                                                                                                                                          | Mortalin–Bcl-xL Complex                                                                                             |                                                                        |
|------------------------------------------------------------------------------------------------------------|------------------------------------------------------------------------------------------------------------------------------------------------------------------------------------------------------------------------------------------|---------------------------------------------------------------------------------------------------------------------|------------------------------------------------------------------------|
| Mortalin                                                                                                   | Bcl-2                                                                                                                                                                                                                                    | Mortalin                                                                                                            | Bcl-xL                                                                 |
| Asp-145, Arg-148, Glu-182, Asp-318, Glu-320, Pro-411, Thr-412, Lys-413, Lys-481, Lys-483, Gly-486, Glu-488 | Arg-109, Arg-110, Ala-113, Glu-114, Ser-117, Gln-118, His-120, Arg-164, Pro-208, Phe-212, Leu-215, Ser-216, Thr-219, Leu-220, Ala-224, Leu-225, Val-226, Gly-227, Ala-228, Cys-229, Gly-233, Ala-234, Tyr-235, Leu-236, His-238, Lys-239 | Thr-379, Asp-380, Val-381, Leu-382, Leu-383, Leu-384, Asp-385, Gln-463, Glu-465, Asp-469, Asp-471, Ala-472, Asn-473 | Trp-181, Asn-185, Gly-186, Asp-189, Thr-190, Glu-193, Leu-194, Tyr-195 |

<sup>1</sup> These authors contributed equally to this work.

<sup>2</sup> Correspondence may be addressed to either of these authors (email [renu-wadhwa@aist.go.jp](mailto:renu-wadhwa@aist.go.jp) or [s-kaul@aist.go.jp](mailto:s-kaul@aist.go.jp) or [sundar@dbeb.iitd.ac.in](mailto:sundar@dbeb.iitd.ac.in)).

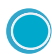**Table S4 Interfacial residues in docked protein–protein complexes after MD simulations**

| <b>Mortalin-Bcl-2 complex</b>                                                                                                                                             |                                                                                                            | <b>Mortalin-Bcl-xL complex</b>                                                                                                                                                                                |                                                                                 |
|---------------------------------------------------------------------------------------------------------------------------------------------------------------------------|------------------------------------------------------------------------------------------------------------|---------------------------------------------------------------------------------------------------------------------------------------------------------------------------------------------------------------|---------------------------------------------------------------------------------|
| <b>Mortalin</b>                                                                                                                                                           | <b>Bcl-2</b>                                                                                               | <b>Mortalin</b>                                                                                                                                                                                               | <b>Bcl-xL</b>                                                                   |
| Arg-148, Lys-152, Glu-202, Gln-204, Lys-205, Gly-206, Val-207, Phe-208, Glu-209, Val-210, Lys-211, Val-378, Thr-379, Asp-380, Val-381, Leu-382, Leu-383, Leu-384, Asp-385 | Arg-110, Glu-114, Ser-117, Gln-118, His-120, Arg-164, Glu-165, Leu-223, Val-226, Gly-237, His-238, His-239 | Gln-204, Lys-205, Gly-206, Val-207, Phe-208, Glu-209, Leu-403, Ile-404, Asn-405, Arg-406, Asn-407, Thr-408, Pro-411, Thr-412, Lys-413, Lys-414, Ser-415, Gln-416, Val-417, Phe-418, Asp-471, Ala-472, Asn-473 | Trp-181, Glu-184, Asn-185, Gly-186, Asp-189, Thr-190, Glu-193, Leu-194, Tyr-195 |

**Table S5 H-bond occupancy of mortalin–Bcl-2 complex during MD simulation Stable H-bonds with high occupancy are shown in bold letters.**

| <b>Mortalin</b>     | <b>Bcl-2</b>        | <b>Occupancy</b> |
|---------------------|---------------------|------------------|
| <b>Gln-204-side</b> | <b>Ser-117-side</b> | <b>42.28%</b>    |
| Val-381-main        | Val-226-main        | 1.15%            |
| <b>Asp-380-side</b> | <b>Arg-110-side</b> | <b>100.00%</b>   |
| <b>Glu-202-side</b> | <b>Ser-117-side</b> | <b>69.08%</b>    |
| <b>Glu-320-side</b> | <b>Arg-164-side</b> | <b>37.97%</b>    |
| Val-210-main        | Gln-118-side        | 11.60%           |
| <b>Asp-385-side</b> | <b>Lys-239-side</b> | <b>34.47%</b>    |
| Lys-205-main        | Glu-114-side        | 6.62%            |
| <b>Gly-206-main</b> | <b>Glu-114-side</b> | <b>25.60%</b>    |
| Glu-182-side        | Arg-109-side        | 1.25%            |
| Lys-413-side        | Leu-215-main        | 5.94%            |
| Glu-209-side        | Tyr-235-main        | 0.72%            |
| Asp-380-side        | Ala-228-main        | 2.83%            |
| Glu-320-side        | His-120-side        | 1.34%            |
| Glu-209-side        | Gln-118-side        | 8.15%            |
| <b>Glu-209-side</b> | <b>Ala-234-main</b> | <b>32.89%</b>    |
| Asp-380-main        | Hie-238-side        | 0.10%            |
| Val-207-main        | Glu-114-side        | 7.19%            |
| Lys-413-side        | Thr-219-side        | 0.05%            |
| Asp-380-side        | Cys-229-side        | 0.05%            |
| Thr-379-side        | Arg-110-side        | 0.38%            |
| Lys-481-side        | Asp-211-side        | 1.01%            |
| Thr-379-side        | Arg-110-side        | 0.14%            |
| Val-210-main        | Tyr-235-side        | 2.25%            |

**Table S6 H-bond occupancy of mortalin–Bcl-xL complex during MD simulation Stable H-bonds with high occupancy are shown in bold letters.**

| <b>Mortalin</b>     | <b>Bcl-xL</b>       | <b>Occupancy</b> |
|---------------------|---------------------|------------------|
| <b>Lys-481-side</b> | <b>Glu-202-side</b> | <b>34.52%</b>    |
| Lys-483-side        | Glu-193-side        | 0.96%            |
| <b>Glu-488-side</b> | <b>Arg-204-side</b> | <b>100.00%</b>   |
| <b>Asp-471-side</b> | <b>Arg-212-side</b> | <b>100.00%</b>   |
| Lys-483-side        | Glu-193-main        | 0.62%            |
| Asn-405-side        | Asp-133-side        | 5.32%            |
| Asp-380-side        | Arg-212-side        | 0.62%            |
| Asp-380-side        | Trp-213-main        | 8.44%            |
| Ser-415-main        | Asn-136-side        | 3.79%            |
| Asp-385-side        | Ser-231-side        | 2.73%            |
| Gln-463-side        | Thr-190-side        | 1.25%            |
| Lys-414-side        | Asn-136-side        | 0.14%            |
| Val-417-main        | Asn-185-side        | 8.34%            |
| <b>Asp-385-side</b> | <b>Gly-227-main</b> | <b>20.13%</b>    |
| <b>Lys-414-side</b> | <b>Asp-133-side</b> | <b>25.60%</b>    |
| Gln-463-side        | Thr-190-side        | 5.80%            |
| Asn-405-side        | Lys-233-side        | 0.24%            |
| Asn-473-side        | Arg-212-side        | 2.73%            |
| Asp-385-side        | Ser-231-main        | 4.46%            |
| Asn-407-side        | Lys-233-side        | 1.34%            |
| Arg-406-main        | Lys-233-side        | 6.57%            |
| Gln-463-side        | Asn-185-main        | 1.73%            |
| Gln-416-side        | Trp-181-side        | 0.14%            |
| Arg-209-side        | Asp-179-main        | 0.05%            |
| Gln-463-side        | Asp-189-side        | 0.91%            |
| Asn-407-side        | Ser-231-side        | 0.05%            |
| Lys-483-side        | Thr-190-side        | 3.88%            |
| <b>Arg-209-side</b> | <b>Glu-182-side</b> | <b>67.02%</b>    |
| Lys-481-side        | Glu-193-side        | 18.98%           |
| Lys-483-side        | Thr-190-main        | 0.14%            |
| Gln-416-side        | Glu-184-side        | 0.10%            |
| Arg-209-side        | Lys-180-main        | 0.43%            |
| Gln-463-side        | Glu-184-main        | 0.10%            |
| Gln-463-side        | Glu-184-side        | 0.05%            |
| Glu-465-side        | Asn-185-side        | 0.14%            |
| Lys-483-side        | Asn-185-main        | 0.91%            |
| Lys-413-side        | Thr-219-side        | 0.34%            |
| <b>His-536-side</b> | <b>Glu-184-side</b> | <b>33.27%</b>    |
| Glu-543-side        | Gln-183-side        | 0.24%            |
| Lys-413-side        | Phe-214-main        | 0.14%            |

Received 25 March 2013/28 May 2013; accepted 3 June 2013

Published as Immediate Publication 20 September 2013, doi 10.1042/BSR20130034
